# Supplementary material
Source: PubMed Central journal article supplement (PMC7483902)

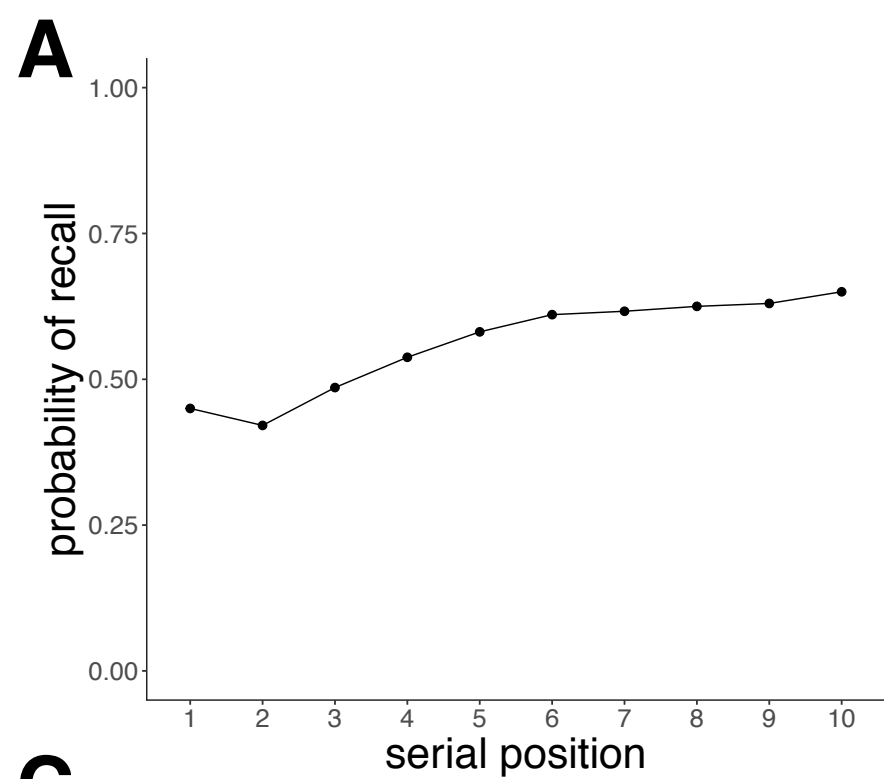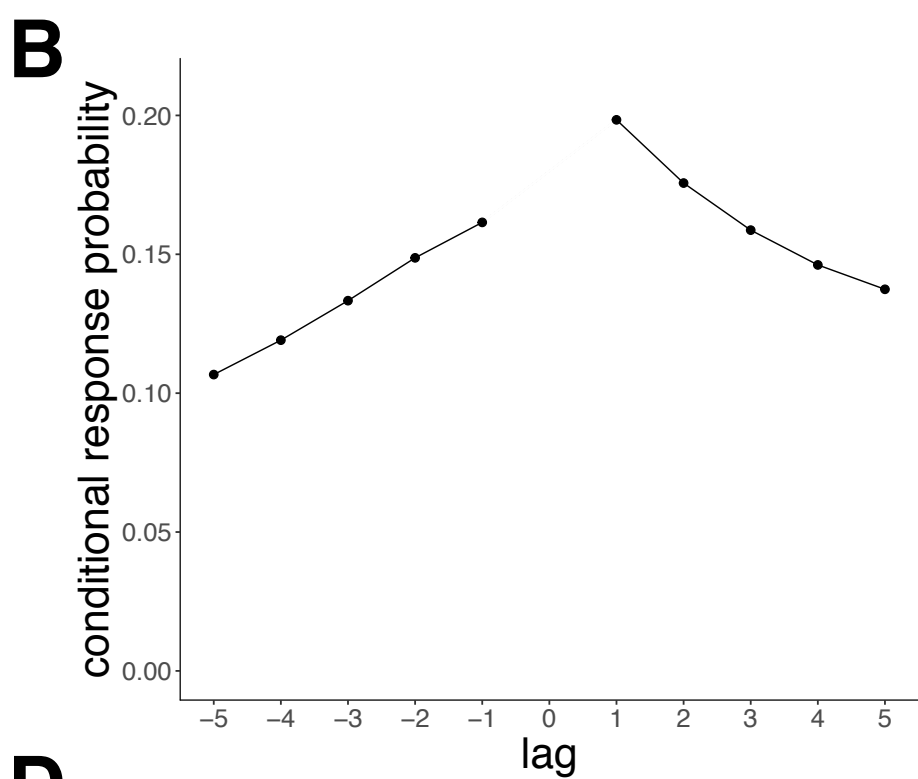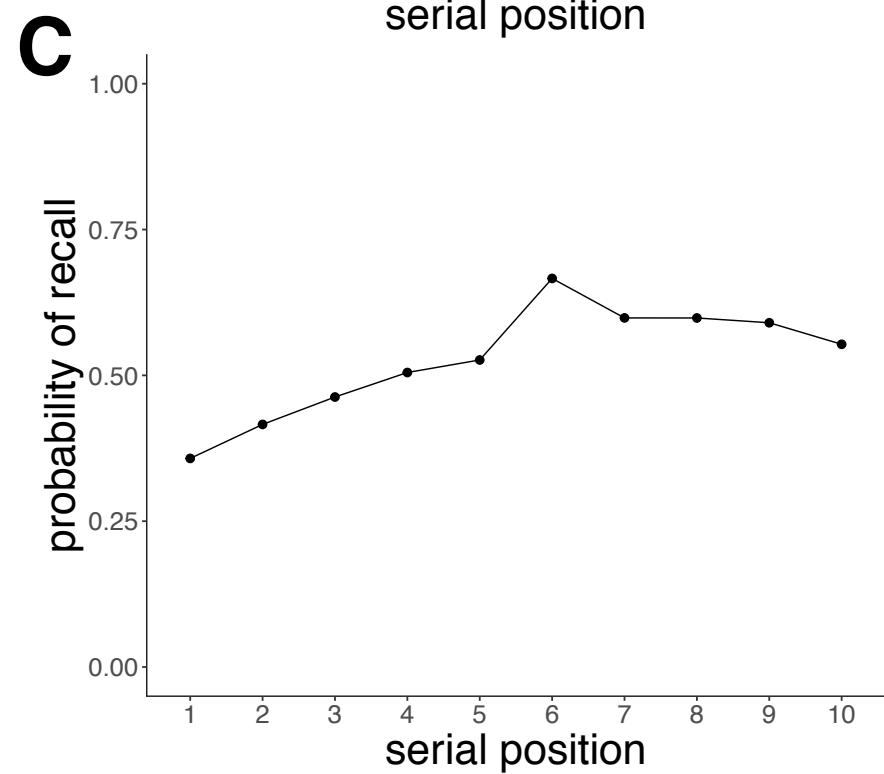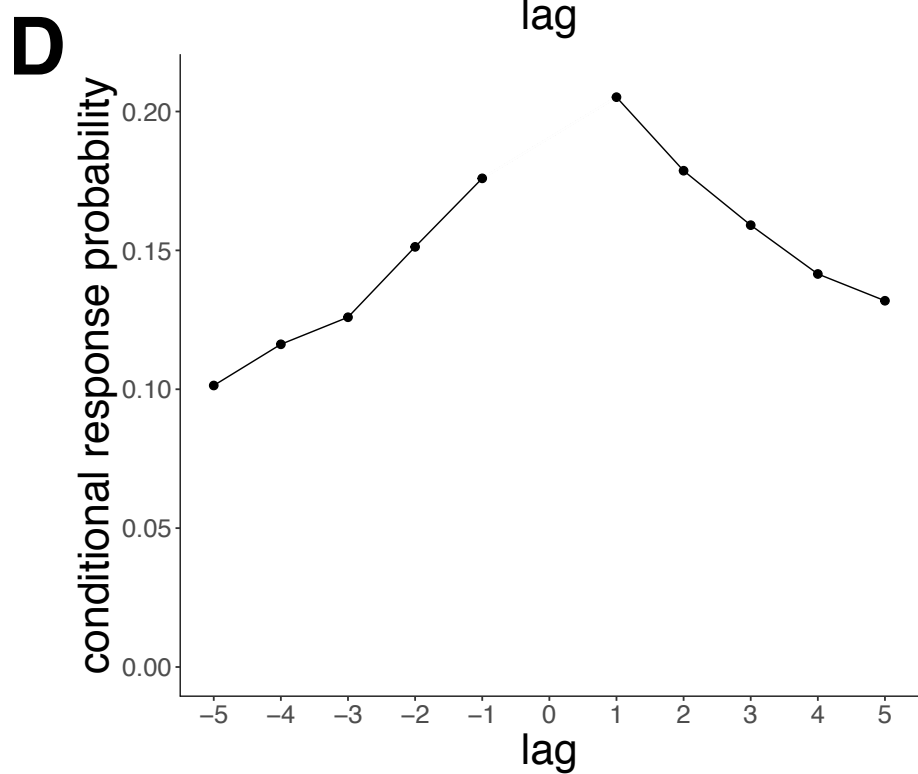

Supplement: NIHMS1607704-supplement-01.pdf [file NIHMS1607704-supplement-01.pdf]

### DATA

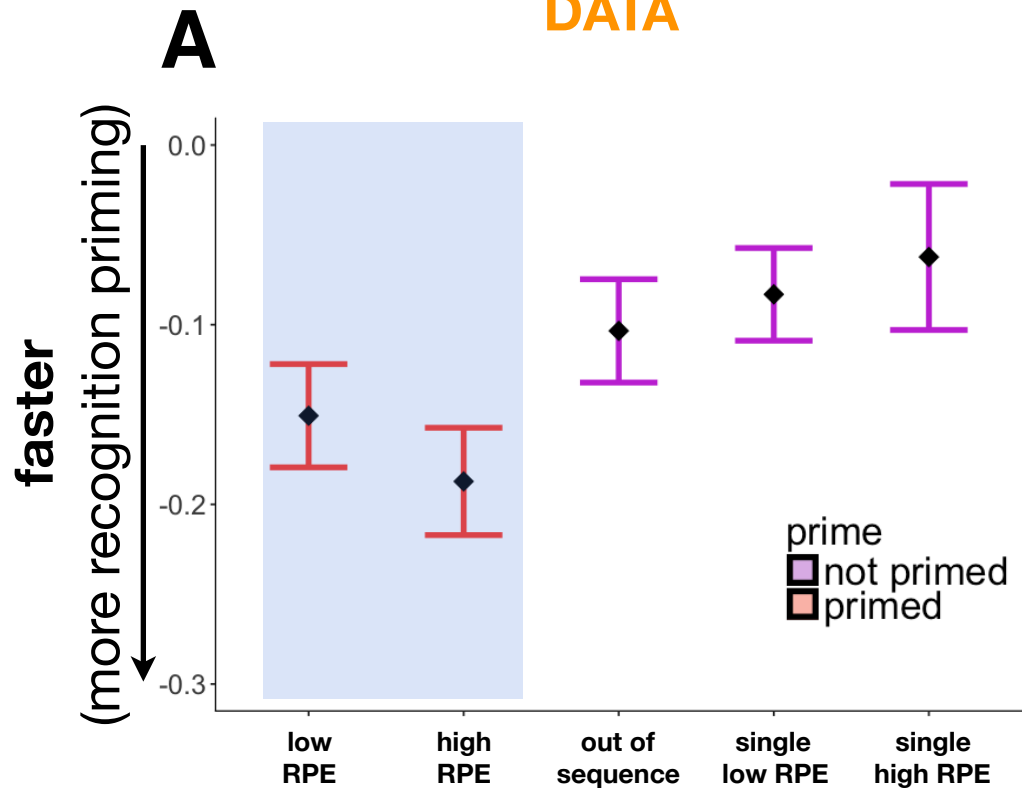

### B current model: (1) learning, (2) context update

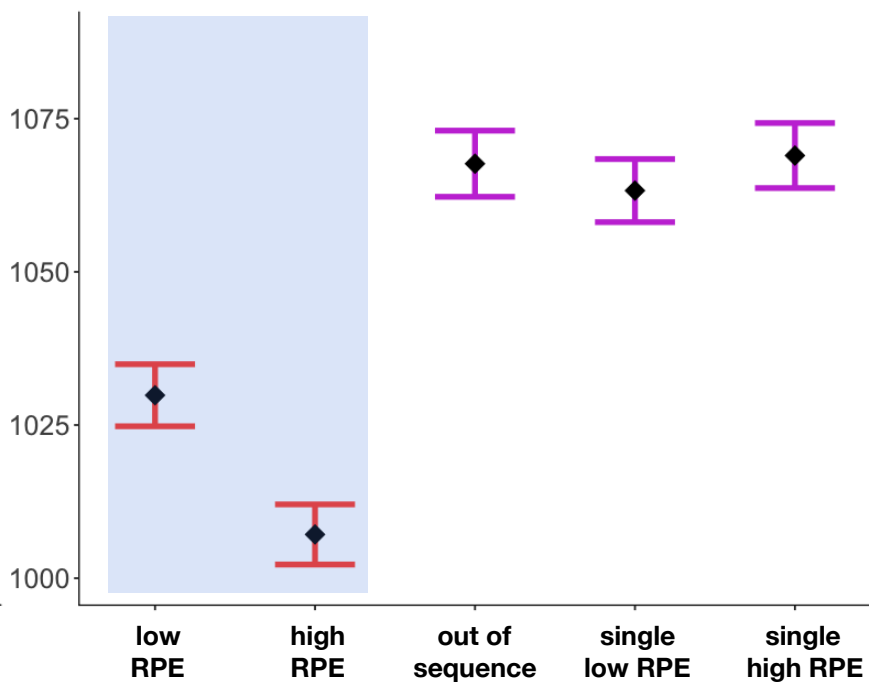

### C original model: (1) context update, (2) learning

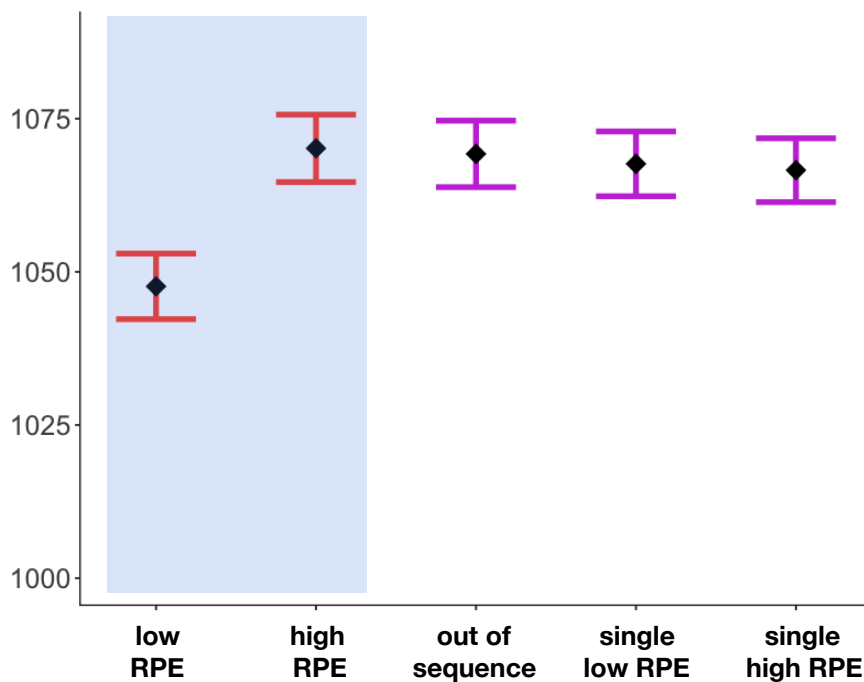

Supplement: NIHMS1607704-supplement-02.pdf [file NIHMS1607704-supplement-02.pdf]
